# Supplementary material for: Antinociceptive and Anti-Inflammatory Effects of Recombinant Crotamine in Mouse Models of Pain
Source: MDPI journal article supplement (doi:10.3390/toxins13100707), 2021-10-06
Supplement: s1 [file s1]

Supplementary Information

Takuto Oyama, Motoyasu Miyazaki, Michinobu Yoshimura, Tohru Takata, Hiroyuki Ohjim  
and Shiro Jimi

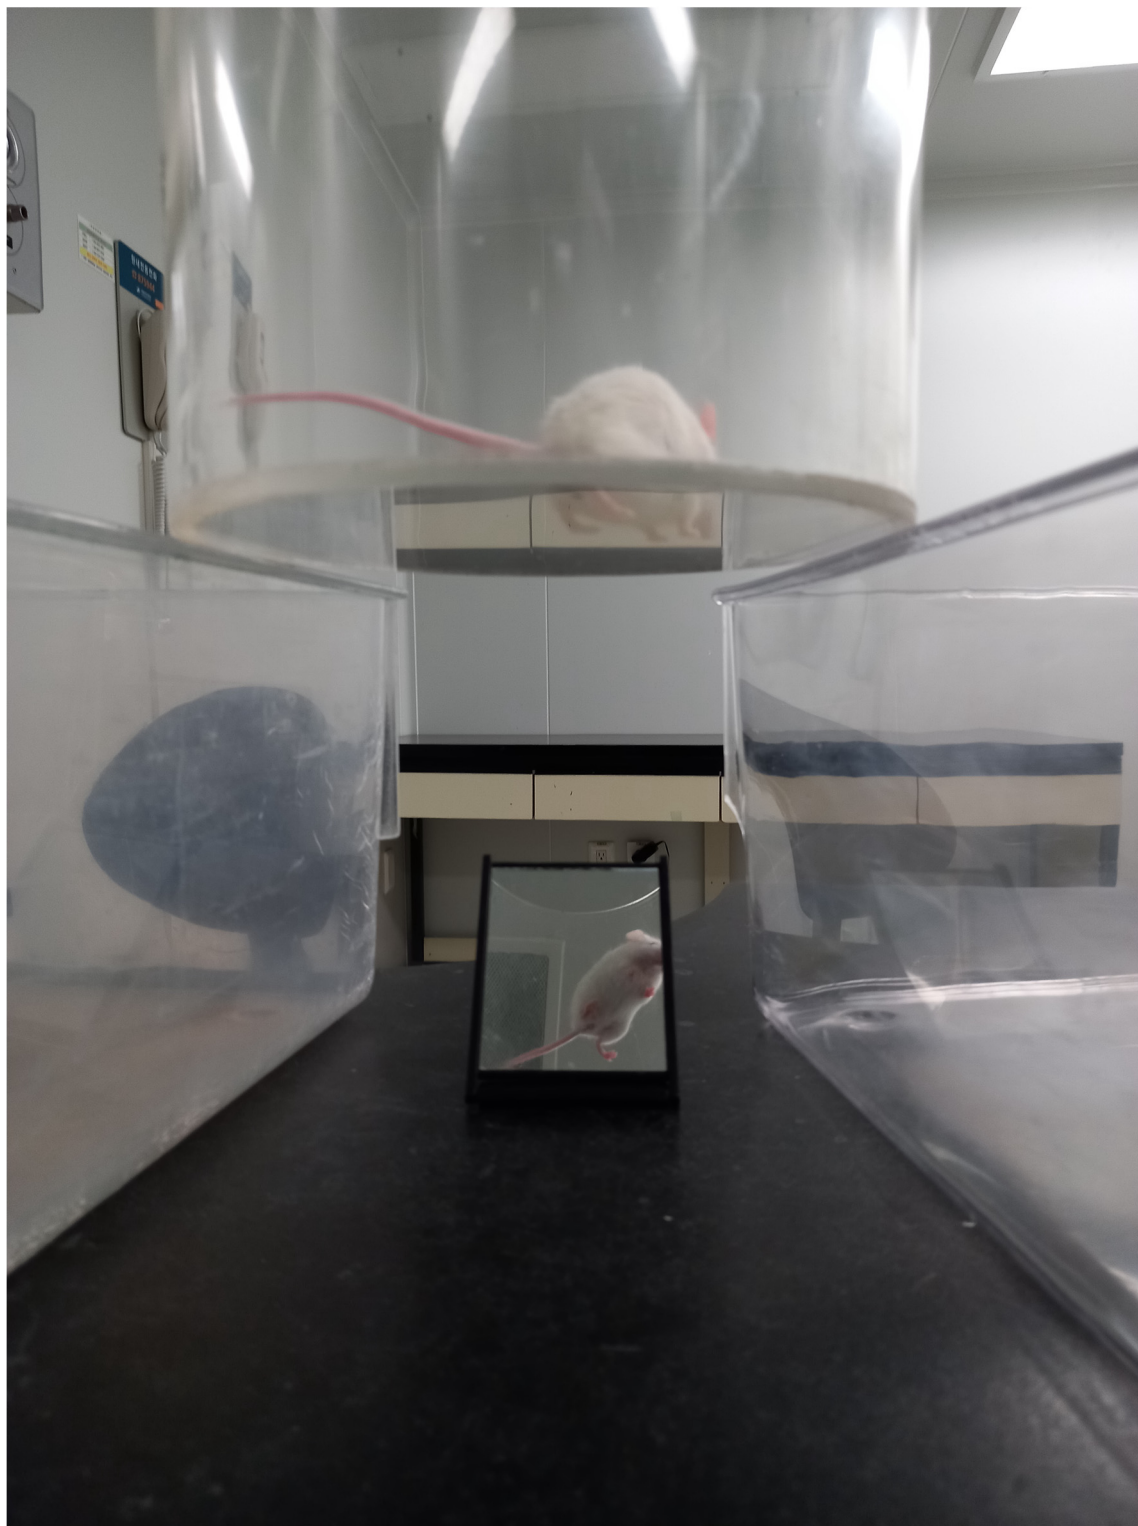

**Supplementary Figure S1.** A real time picture of transparent acrylic observation cage.
